# Supplementary material
Source: publisher site journal article supplement (https://www.dovepress.com/article/488890)
Supplement: Supplementary file 1 [file get_supplementary_file.php]

**Article Title:** Exploring self-management behavior profiles in patients with multimorbidity from the capacity-workload interaction perspective: A sequential, explanatory mixed-methods study

**Supplement Contents**

**eTable 1** Model fit indices for different models (*n* = 1,920)

**eTable 2** Mean values across different dimensions of the PIH by latent profiles

**eTable 3** Participants’ characteristics of qualitative Study (*n* = 16)

**eTable 4** Themes and quotes from qualitative interviews

**eAppendix 1** Included chronic diseases list

**eAppendix 2** The details of revised and self-developed scale items

**eAppendix 3** Measurements of quantitative survey

**eAppendix 4** Qualitative Interview Guide

**eTable 1** Model fit indices for different models (*n* = 1,920)

| **Model** | **AIC** | **BIC** | **aBIC** | **Entropy** | ***P*** | | **Case number (Category probability, %)** |
| --- | --- | --- | --- | --- | --- | --- | --- |
| **LMR** | **BLRT** |
| 1-profile | 30752.688 | 30797.169 | 30771.752 | -- | -- | -- | 1,920 (100%) |
| 2-profile | 28660.789 | 28733.070 | 28691.768 | 0.875 | ＜0.001 | ＜0.001 | 390(20.3%)/1,530(79.7%) |
| **3-profile** | **27896.115** | **27996.196** | **27939.010** | **0.852** | **＜0.001** | **＜0.001** | **566(29.5%)/154(8.0%)/1,200(62.5%)** |
| 4-profile | 27542.366 | 27670.248 | 27597.177 | 0.753 | ＜0.001 | ＜0.001 | 143(7.4%)/451(23.5%)/766(39.9%)/560(29.2%) |
| 5-profile | 27335.233 | 27490.916 | 27401.959 | 0.779 | 0.0065 | ＜0.001 | 42(2.2%)/172(9.0%)/437(22.8%)/667(34.7%)/602(31.4%) |

**Abbreviations***: AIC*, Akaike information criterion, *BIC*, Bayesian information criterion, *aBIC,* sample size-adjusted BIC; *BLRT*, bootstrap likelihood ratio test.

**eTable 2** Mean values across different dimensions of the PIH by latent categories

| **Dimension** | **Score (Mean)** | | |
| --- | --- | --- | --- |
| **Symptom-driven Profile**  **(*n* = 154, 8.0%)** | **Passive-engagement Profile**  **(*n* = 566, 29.5%)** | **Active-cooperation Profile**  **(*n* = 1,200, 62.5%)** |
| Knowledge of illness and treatment | 2.235 | 4.995 | 7.127 |
| Recognition and management of symptoms | 2.970 | 4.856 | 5.761 |
| Patient-health professional partnership | 2.572 | 4.830 | 6.862 |
| Coping with chronic illness | 2.807 | 5.168 | 6.427 |

**Abbreviations***:* PIH, The Partners in Health scale.

**eTable 3** Participants’ characteristics of qualitative study (*n* = 16)

| **ID** | **Gender** | **Age** | **Occupational status** | **Residential type** | **Educational level** | **Monthly household income (RMB)** | **Medical insurance** | **Number of medicines** | **Chronic diseases** | **Self-management profile** |
| --- | --- | --- | --- | --- | --- | --- | --- | --- | --- | --- |
| N1 | Male | 73 | Retired | Urban | College | 1,000-5,000 | Urban employee basic medical insurance | 1+TCM | Hypertension, Colorectal cancer, Lung cancer | Active-cooperation Profile |
| N2 | Male | 85 | Retired | Urban | Bachelor | 5,000-10,000 | Urban employee basic medical insurance | 10+TCM | Hypertrophic obstructive cardiomyopathy with atrial fibrillation, Diabetes, Cataract, Prostatic hyperplasia, Intervertebral disc disease | Active-cooperation Profile |
| N3 | Male | 81 | Retired | Urban | College | 5,000-10,000 | Urban employee basic medical insurance | 5 | Hypertension, Diabetes, chronic stroke, Prostate cancer, Cataract. | Passive-engagement Profile |
| N4 | Male | 76 | Retired | Urban | College | 5,000-10,000 | Urban employee basic medical insurance | 13 | Hypertension, Lipid metabolism disorders, Diabetes, Myocardial infarct, Prostatic hyperplasia. | Active-cooperation Profile |

**eTable 3** Participants’ characteristics of qualitative study (*n* = 16) *(Continued)*

| **ID** | **Gender** | **Age** | **Occupational status** | **Residential type** | **Educational level** | **Monthly household income (RMB)** | **Medical insurance** | **Number of medicines** | **Chronic diseases** | **Self-management Profile** |
| --- | --- | --- | --- | --- | --- | --- | --- | --- | --- | --- |
| N5 | Female | 75 | Retired | Urban | College | 5,000-10,000 | Urban employee basic medical insurance | 5+TCM | Lung cancer, Peptic ulcer disease, Uterine fibroids. | Active-cooperation Profile |
| N6 | Male | 75 | Retired | Urban | College | 1,000-5,000 | Urban employee basic medical insurance | 6 | Hypertension, Diabetes mellitus, Asthma, Chronic Obstructive Pulmonary Disease(COPD), Atrial fibrillation, Coronary artery disease, Prostatic hyperplasia, Cataract. | Active-cooperation Profile |
| N7 | Male | 65 | Farmer | Rural | Junior school | 1,000-5,000 | New rural cooperative medical scheme | 2 | Diabetes mellitus, Colorectal cancer. | Active-cooperation Profile |
| N8 | Male | 72 | Retired | Rural | Junior school | 1,000-5,000 | Urban employee basic medical insurance | 6 | Hypertension,Lipid metabolism disorders, Esophageal cancer, Prostatic hyperplasia. | Symptom-driven Profile |

**eTable 3** Participants’ characteristics of qualitative study (*n* = 16) *(Continued)*

| **ID** | **Gender** | **Age** | **Occupational status** | **Residential type** | **Educational level** | **Monthly household income (RMB)** | **Medical insurance** | **Number of medicines** | **Chronic diseases** | **Self-management Profile** |
| --- | --- | --- | --- | --- | --- | --- | --- | --- | --- | --- |
| N9 | Female | 71 | Unemployed | Rural | Middle school | 1,000-5,000 | Urban resident basic medical insurance | 6 | Hypertension, Peptic ulcer disease, Gout, Uterine cancer. | Passive-engagement Profile |
| N10 | Female | 58 | Freelancer | Rural | Middle school | 1,000-5,000 | New rural cooperative medical scheme | 3 (Self-discontinuation) | Hypertension, Lipid metabolism disorders, Diabetes. | Symptom-driven Profile |
| N11 | Male | 70 | Freelancer | Rural | Junior school | 1,000-5,000 | New rural cooperative medical scheme | 5 | Bradycardia, Diabetes. | Passive-engagement Profile |
| N12 | Female | 68 | sanitation worker | Rural | Junior school | 1,000-5,000 | New rural cooperative medical scheme | 1 | Breast cancer, Hypertension. | Symptom-driven Profile |
| N13 | Female | 66 | Farmer | Rural | High school | 1,000-5,000 | New rural cooperative medical scheme | 1 | Hypertension, Lipid metabolism disorders, Arthritis. | Symptom-driven Profile |

**eTable 3** Participants’ characteristics of qualitative study (*n* = 16) *(Continued)*

| **ID** | **Gender** | **Age** | **Occupational status** | **Residential type** | **Educational level** | **Monthly household income (RMB)** | **Medical insurance** | **Number of medicines** | **Chronic diseases** | **Self-management Profile** |
| --- | --- | --- | --- | --- | --- | --- | --- | --- | --- | --- |
| N14 | Male | 66 | Retired | Town | Middle school | 1,000-5,000 | Urban employee basic medical insurance | 5 | Diabetes, Hypertension, Myocardial infarction, Chronic stroke. | Symptom-driven Profile |
| N15 | Male | 83 | Retired | Urban | High school | 5,000-10,000 | Urban resident basic medical insurance | 9 | Chronic ischemic heart disease, Diabetes with retinopathy and neuropathy, Hypertension, Lipid metabolism disorders. | Active-cooperation Profile |
| N16 | Male | 74 | Retired | Town | Middle school | 5,000-10,000 | Urban employee basic medical insurance | 6 | Hypertension, Diabetes, Lipid metabolism disorders. | Passive-engagement Profile |

**Abbreviations**: TCM, Traditional Chinese Medicine.

**eTable 4** Themes and quotes from qualitative interviews

| **Themes** | **Latent profiles** | **Coping strategies (Detailed)** | **Representative quotes** |
| --- | --- | --- | --- |
| Workload of psychological strain | Symptom-driven Profile | Actively avoided social interactions due to disease stigma. | *N10: "That period, I tried to avoid public places as much as possible. I'd feel embarrassed if they caught a whiff of odor."*  *(Female, 58 years old)* |
| Passive-engagement  Profile | Fear of disease recurrence strengthened self-monitoring awareness. | *N3: "This disease feels like having a time bomb inside my body. I have to pay more attention in my daily life and raise awareness of self-management."*  *(Male, 81 years old)* |
| Active-cooperation Profile | Actively adapting to long-term chronic conditions. | *N1: "I feel that having undergone two major surgeries and still being alive now is quite good [laughs]. A positive mindset and self-management help to stabilize the conditions."*  *(Male, 73 years old)* |
| Workload of multiple medical knowledge acquisition and communication | Symptom-driven Profile | Medical knowledge was typically acquired passively from doctors, and medical decisions were often made by doctors and family members. | *N12: "I just go along with whatever the doctor says for treatment. I don't really ask much because I don't understand much about it. Mostly, it's my eldest daughter who communicates with the doctor."*  *(Female, 68 years old)* |
| Passive-engagement  Profile | Generally did not actively seek out health information and lacked the ability to judge the accuracy of the information, typically relying on doctors for proactive health education. | *N9: "I don't understand much about it [medical information], I just took [medicines] whatever the doctors prescribed or what they asked me to do. Sometimes, I also tried out methods I came across on the internet."*  *(Female, 71 years old)* |

**eTable 4** Themes and quotes from qualitative interviews (Continued)

| **Themes** | **Latent profiles** | **Coping strategies (Detailed)** | **Representative quotes** |
| --- | --- | --- | --- |
| Workload of multiple medical knowledge acquisition and communication | Active-  cooperation  Profile | Actively engaging in shared decision-making and communication, demonstrating high levels of self-sufficiency. | *N2: "The former specialist was not easy to communicate, so I changed a doctor. I kept a record of the monitoring data in a notebook, so the doctor would understand my condition more clearly. I enjoyed communicating with the doctor."*  *(Male, 85 years old)* |
| Workload of adverse symptom management | Symptom-driven  Profile | Abandoned symptom management. | *N14: "...Complications emerged despite my strict adherence. I've thought about it, and if complications arise despite my strict diet, then I might as well indulge."*  *(Male, 66 years old)* |
| Passive-  engagement  Profile | Usually endured symptoms and did not pursue medical consultations when symptoms were tolerable. | *N9: "When I feel uncomfortable here [pointing to her abdomen], I usually just massage it myself to ease the discomfort."*  *(Female, 71 years old)* |
| Active-  cooperation  Profile | Actively sought ways to alleviate symptoms but unable to avoid age-related functional decline. | *N1: "...As I'm getting older, I've been experiencing some sleep issues, so I've been adding a bit of traditional Chinese medicine to help alleviate the symptoms."*  *(Male, 73 years old)*  *N5: "I have osteoarthritis because of aging, so I usually avoid going to distant places to prevent it occurs."*  *(Female, 75 years old)* |
| Workload of polypharmacy and treatment management | Symptom-driven  Profile | Commonly neglected to follow medication instructions (e.g., forgetting doses, incorrect dosing), and was accompanied by an unhealthy lifestyle and poor treatment adherence. | *N10: "I just felt uncomfortable taking the medication, and mentally, I started feeling like a patient. It's been a year and a half since I stopped, and I seem to be doing fine. I don't feel any discomfort."*  *(Female, 58 years old)* |

**eTable 4** Themes and quotes from qualitative interviews (Continued)

| **Themes** | **Latent profiles** | **Coping strategies (Detailed)** | **Representative quotes** |
| --- | --- | --- | --- |
| Workload of polypharmacy and treatment management | Passive-engagement  Profile | Frequently eased the management once chronic conditions stabilized, and unwilling to sustain healthy lifestyle habits long-term, with moderate treatment adherence. | *N3: "I don't bother jotting down the [blood pressure, blood sugar] readings..., if the fluctuations aren't significant, there's no need to worry about it."*  *(Male, 81 years old)* |
| Active-cooperation  Profile | Adhered to medication and treatment compliance over the long term while maintaining a healthy lifestyle. | *N2: "...my spouse and I have a strict schedule for taking our medication and diet every day for so many years."*  *(Male, 85 years old)* |
| Workload of social roles balance | Symptom-driven  Profile | Prioritized family roles. | *N10: "Because I've been busy with home renovations, I haven't checked [my blood pressure, blood sugar] for a long time."*  *(Female, 58 years old)* |
| Passive-engagement  Profile | Adjusted based on circumstances. | *N16: "For short trips, I never bring medication because I feel it's okay to miss it for a day or two. But if it's for a week or longer, then I'll bring my medication."*  *(Male, 74 years old)* |
| Active-cooperation  Profile | Prioritized disease management. | *N2: "We prioritize medication preparation even more than meals. If we miss our medication, it bothers us mentally. Even when we need to go out for errands, we still adhere to our fixed schedule for taking medication and measuring blood pressure."*  *(Male, 85 years old)* |

**eTable 4** Themes and quotes from qualitative interviews (Continued)

| **Themes** | **Latent profiles** | **Coping strategies (Detailed)** | **Representative quotes** |
| --- | --- | --- | --- |
| Workload of accessing multiple medical resources | Symptom-driven  Profile | (i). Due to limited health awareness and constrained access to healthcare facilities, patients rarely sought advanced medical resources.Moreover, (ii). they were inclined to forgo treatment or opt for lower-cost alternative therapies because of exorbitant medication expenses. | *N12: "I was considering giving up treatment back then because my family didn't have money...And the reimbursement rate for new rural cooperative medical schemes is relatively low..."*  *(Female, 68 years old)* |
| Passive-  engagement  Profile | (i). Moderate health awareness prompted patients to seek available medical resources and services only when necessary, often with support from family members, and sometimes independently. However, (ii).the limited financial situation could only cover basic medical expenses. | *N11: “I used to visit the specialist for follow-up every month, but it's been about six months now since my last visit. The thing is, the cost has become too high for me, especially plus with medication and tests. It's just getting a bit too expensive to manage. So now, I only go to get my prescriptions filled each month and have occasional check-ups.”*  *(Male, 70 years old)* |
| Active-  cooperation  Profile | (i). Actively participated in health education activities to enhance their health awareness and sought the necessary medical resources proactively. (ii). Opted for the highest-quality medical services within their economic means, despite the higher prices. | *N15: "My daughter will give us over 2,000 RMB each month... if you request a specialist, you have to pay the extra fee... But it's still within our means, so we will choose to spend that money."*  *(Male, 83 years old)* |

**eAppendix 1** Included chronic diseases list

| **Chronic disease** | **CCI** | **Chronic disease** | **CCI** |
| --- | --- | --- | --- |
| Metastatic solid tumor | 6 | Hypertension | 0 |
| Moderate or severe liver disease | 3 | Lipid metabolism disorders | 0 |
| Diabetes with end organ damage | 2 | Chronic cholecystitis/gallstones | 0 |
| Moderate or severe renal disease | 2 | Other types of heart disease | 0 |
| Solid tumor | 2 | Fatty liver disease | 0 |
| Hemiplegia | 2 | Mild renal disease | 0 |
| Diabetes | 1 | Cardiac arrhythmias | 0 |
| Myocardial infarct | 1 | Depression, Anxiety | 0 |
| Congestive heart failure | 1 | Parkinson’s disease | 0 |
| Chronic ischemic heart disease | 1 | Intervertebral disc disorder, Cervical spine diseases | 0 |
| Cerebral ischemia/chronic stroke | 1 | Osteoporosis | 0 |
| Ulcer disease | 1 | Lower limb varicosis | 0 |
| Chronic pulmonary disease | 1 | Hyperuricemia/gout | 0 |
| Connective tissue disease | 1 | Prostatic hyperplasia | 0 |
| Mild liver disease | 1 | Glaucoma, cataracts | 0 |
| Asthma | 0 | Thyroid diseases | 0 |

**Abbreviations***:* CCI, Charlson Comorbidity Index.

**eAppendix 2** the Details of revised and self-developed scale items

| **the Brief Resilience Scale (BRS) (Revised)** | |
| --- | --- |
| 1. I tend to bounce back quickly after hard times. | □Strongly Disagree □Disagree □Neutral □Agree □Strongly Agree |
| 1. I usually come through difficult times with little trouble. | □Strongly Disagree □Disagree □Neutral □Agree □Strongly Agree |
| 1. I tend to take a long time to get over setbacks in my life. | □Strongly Disagree □Disagree □Neutral □Agree □Strongly Agree |
| 1. It is hard for me to snap back when something bad happens. | □Strongly Disagree □Disagree □Neutral □Agree □Strongly Agree |
| 1. I have a hard time making it through stressful events. | □Strongly Disagree □Disagree □Neutral □Agree □Strongly Agree |
| **the Mental Health dimension of the SF-36 Short Form36 (Revised)** | |
| 1. Have you been a very nervous person? | □All of the time □Most of the time □Some of the time □A little of the time □None of the time |
| 1. Have you felt so down in the dumps that nothing could cheer you up? | □All of the time □Most of the time □Some of the time □A little of the time □None of the time |
| 1. Have you felt calm and peaceful? | □All of the time □Most of the time □Some of the time □A little of the time □None of the time |
| 1. Have you been a happy person? | □All of the time □Most of the time □Some of the time □A little of the time □None of the time |
| **the PROMIS® Social Support scale (Revised)** | |
| 1. I have someone who will take me to the doctor if I need it. | □Never □Rarely □Sometimes □Often □Always |
| 1. I have someone who will listen to me when I need to talk. | □Never □Rarely □Sometimes □Often □Always |
| 1. I have someone to confide in or talk to about myself or my problems. | □Never □Rarely □Sometimes □Often □Always |
| 1. I have someone to turn to for suggestions about how to deal with a problem about my ability to do things for fun. | □Never □Rarely □Sometimes □Often □Always |
| **Environmental capacity (Self-developed)** |  |
| 1. Markets, supermarkets, fruit shops, and fresh food stores within walking distance (10-15 minutes walk) from my home | □Strongly Disagree □Disagree □Neutral □Agree □Strongly Agree |
| 1. Bus stops or subway stations within walking distance (10-15 minutes walk) from my home | □Strongly Disagree □Disagree □Neutral □Agree □Strongly Agree |
| 1. Parks, playgrounds, and other free or low-cost fitness facilities within walking distance (10-15 minutes walk) from my home | □Strongly Disagree □Disagree □Neutral □Agree □Strongly Agree |
| 1. Community healthcare centers within walking distance (10-15 minutes walk) from my home | □Strongly Disagree □Disagree □Neutral □Agree □Strongly Agree |
| 1. Tertiary hospitals within one hour (by subway, bus, driving, etc.) from my home | □Strongly Disagree □Disagree □Neutral □Agree □Strongly Agree |
| **Economic capacity (Self-developed)** |  |
| How satisfied are you with your current economic situation? | Range 0-10, 0 = very unsatisfied 10 = very satisfied |

**Notes: Used with permission from SF-36 Health Survey (SF-36® / SF-36v2®). Available from: https://eprovide.mapi-trust.org/instruments/sf-36-health-survey.**

**©2008-2017 David Cella on behalf of the National Institute for Neurological Disorders and Stroke (NINDS). Some content used with permission of the PROMIS Health Organization.**

**Abbreviations**: PROMIS, Patient-Reported Outcomes Measurement Information System.

**eAppendix 3** Measurements of quantitative survey

| **Domains** | | **Scale** | **Number of items** | **Cronbach’s *α* in original scale** | **Cronbach’s *α* in this study** |
| --- | --- | --- | --- | --- | --- |
| **Self-management behavior**  *(Dependent variables)* | | Partners in Health Scale (PIH) | 12 | 0.89 | 0.90 |
| **Patient workload of demands** *(Independent variables)* | |  |  |  |  |
| Workload of psychological conditions | | the Patient-Reported Outcomes Measurement Information System® (PROMIS®) Anxiety scale | 4 | 0.97 | 0.94 |
| the 9-item Patient Health Questionnaire-9 (PHQ-9) | 9 | 0.83 | 0.87 |
| Workload of physical symptoms | | the 15-item Patient Health Questionnaire-15 (PHQ-15) | 15 | 0.73 | 0.77 |
| Workload of medications management | | the Treatment Burden Questionnaire (TBQ) | 15 | 0.89 | 0.87 |
| Workload of medical appointments | |
| Workload of disruptions in life | |
| Workload of illness concerns | |
| **Patient capacity** *(Independent variables)* | |  |  |  |  |
| Personal Capacity | Self-efficacy capacity | the Self-efficacy for Managing Chronic Disease Scale | 6 | 0.91 | 0.88 |
| Resilience capacity | the Brief Resilience Scale (BRS) **(Revised)** | 5 | 0.85 | 0.87 |
| Physical capacity | | Physical Functioning dimension of the SF-36 Short Form | 10 | 0.90 | 0.92 |
| Emotional capacity | | the Mental Health dimension of the SF-36 Short Form **(Revised)** | 4 | 0.67 | 0.76 |
| Social capacity | | the PROMIS® Social Support scale **(Revised)** | 4 | 0.99 | 0.83 |
| Environmental capacity | | Self-developed | 5 | / | 0.91 |
| Economic capacity | | Self-developed | 1 | / | / |

**Abbreviations**: PROMIS, Patient-Reported Outcomes Measurement Information System.**eAppendix 4** Qualitative interview guide

| **No.** | **Explanatory qualitative interview questions** |
| --- | --- |
| 1 | What chronic conditions do you have? How have these conditions affected your life since you were diagnosed? |
| 2 | How do you manage your conditions? Such as...  **Medication management**  - How many medications are you currently taking? How do you organize and prepare your medications daily?  **Complex symptom monitoring**  -What symptoms do you experience? How do you manage these symptoms to reduce their impact on your life?  **Gathering multiple sources of information**  - How do you typically find the healthcare information you need? |
| 3 | How do you feel about your current life? |
| 4 | How do healthcare-related tasks affect your daily routine? |
| 5 | What do you do in your daily life to cope with the impacts of your chronic conditions on your life and health? |
| 6 | What are your thoughts on your condition? |
| 7 | What do you do when you need medical care? |
| 8 | How do you manage the costs associated with your treatment? |
| 9 | Do you think your living situation affects your ability to get medication, see doctors, or go for follow-ups? How? |
| 10 | Have you encountered any other difficulties during your treatment? How do you usually overcome these challenges? |
| 11 | Is there anything else about your experience or feelings that you would like to share with me? |
